# Supplementary material for: Distinct Immunoglobulin Fc Glycosylation Patterns Are Associated with Disease Nonprogression and Broadly Neutralizing Antibody Responses in Children with HIV Infection
Source: PubMed Central journal article supplement (PMC7763548; doi:10.1128/msphere.00880-20), 2020-12-23

A

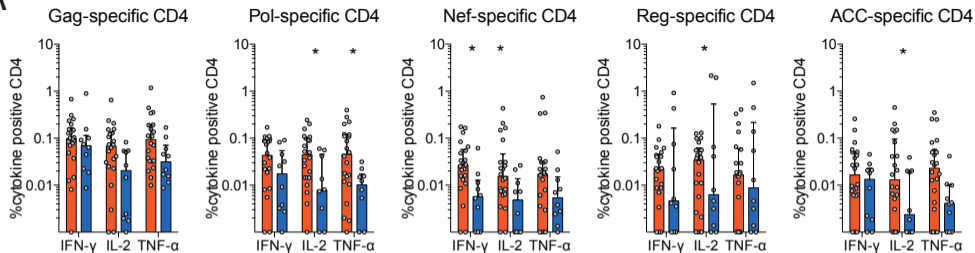

B

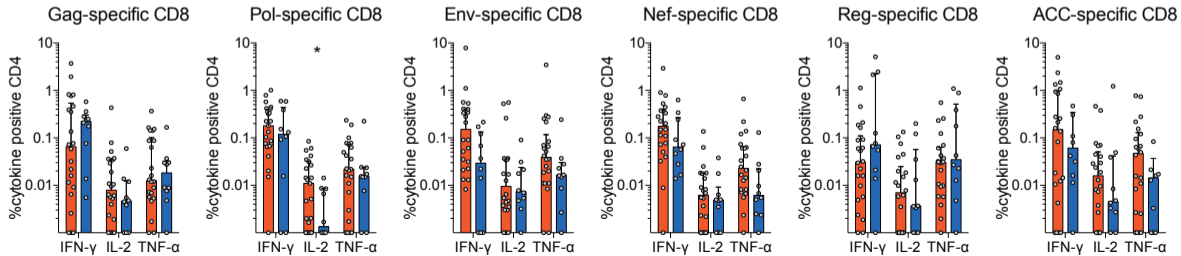

Supplement: mSphere.00880-20-sf001.pdf [file mSphere.00880-20-sf001.pdf]
