# Supplementary material for: Distinct Immunoglobulin Fc Glycosylation Patterns Are Associated with Disease Nonprogression and Broadly Neutralizing Antibody Responses in Children with HIV Infection
Source: PubMed Central journal article supplement (PMC7763548; doi:10.1128/msphere.00880-20), 2020-12-23

**A****p24-specific IgG**

Galactosylation      Fucosylation      Bisection      Sialylation

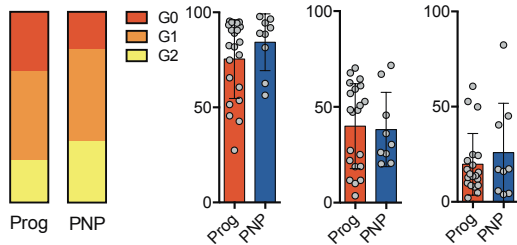**B****gp120-specific IgG**

Galactosylation      Fucosylation      Bisection      Sialylation

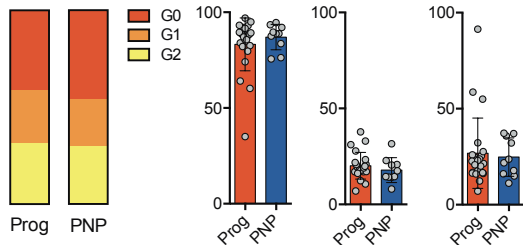

Supplement: mSphere.00880-20-sf002.pdf [file mSphere.00880-20-sf002.pdf]
