# Supplementary material for: Distinct Immunoglobulin Fc Glycosylation Patterns Are Associated with Disease Nonprogression and Broadly Neutralizing Antibody Responses in Children with HIV Infection
Source: PubMed Central journal article supplement (PMC7763548; doi:10.1128/msphere.00880-20), 2020-12-23
Supplement: mSphere.00880-20-st001.pdf [file mSphere.00880-20-st001.pdf]

**gp120**

|                  | <b>MIP-1beta</b> | <b>CD107a</b>    | <b>IFN-gamma</b> |
|------------------|------------------|------------------|------------------|
| <b>MIP-1beta</b> |                  | r=0.93, p<0.0001 | r=0.94, p<0.0001 |
| <b>CD107a</b>    | r=0.93, p<0.0001 |                  | r=0.83, p<0.0001 |
| <b>IFN-gamma</b> | r=0.94, p<0.0001 | r=0.83, p<0.0001 |                  |

**p24**

|                  | <b>MIP-1beta</b> | <b>CD107a</b>    | <b>IFN-gamma</b> |
|------------------|------------------|------------------|------------------|
| <b>MIP-1beta</b> |                  | r=0.53, p=0.0015 | r=0.61, p=0.0002 |
| <b>CD107a</b>    | r=0.53, p=0.0015 |                  | r=0.45, p=0.009  |
| <b>IFN-gamma</b> | r=0.61, p=0.0002 | r=0.45, p=0.009  |                  |
