# Supplementary material for: Distinct Immunoglobulin Fc Glycosylation Patterns Are Associated with Disease Nonprogression and Broadly Neutralizing Antibody Responses in Children with HIV Infection
Source: PubMed Central journal article supplement (PMC7763548; doi:10.1128/msphere.00880-20), 2020-12-23
Supplement: mSphere.00880-20-st002.pdf [file mSphere.00880-20-st002.pdf]

| Number | Feature                                               |
|--------|-------------------------------------------------------|
| 1      | Age at visit                                          |
| 2      | Gender                                                |
| 3      | Viral Load                                            |
| 4      | ADCP gp120                                            |
| 5      | ADCP p24                                              |
| 6      | CD107a-gp120                                          |
| 7      | IFNG-gp120                                            |
| 8      | MIP1b-gp120                                           |
| 9      | CD107a-p24                                            |
| 10     | IFNG-p24                                              |
| 11     | MIP1b-p24                                             |
| 12     | gp120-IgG                                             |
| 13     | gp41-IgG                                              |
| 14     | p24-IgG                                               |
| 15     | gp140-IgG                                             |
| 16     | gp120-IgG1                                            |
| 17     | gp41-IgG1                                             |
| 18     | p24-IgG1                                              |
| 19     | gp140-IgG1                                            |
| 20     | gp120-IgG2                                            |
| 21     | gp41-IgG2                                             |
| 22     | p24-IgG2                                              |
| 23     | gp140-IgG2                                            |
| 24     | gp120-IgG3                                            |
| 25     | gp41-IgG3                                             |
| 26     | p24-IgG3                                              |
| 27     | gp140-IgG3                                            |
| 28     | gp120-IgG4                                            |
| 29     | gp41-IgG4                                             |
| 30     | p24-IgG4                                              |
| 31     | gp140-IgG4                                            |
| 32     | gp120 specific G0                                     |
| 33     | gp120 specific G1 (with & without Sialylation)        |
| 34     | gp120 specific G2 (with & without Sialylation)        |
| 35     | gp120 specific Fucose (with & without Sialylation)    |
| 36     | gp120 specific Bisecting (with & without Sialylation) |
| 37     | gp120 specific Total Sialic Acid                      |
| 38     | Bulk Fc G0                                            |
| 39     | Bulk Fc G1 (with & without Sialylation)               |
| 40     | Bulk Fc G2 (with & without Sialylation)               |
| 41     | Bulk Fc Fucose (with & without Sialylation)           |
| 42     | Bulk Fc Bisecting (with & without Sialylation)        |
| 43     | Bulk Fc Total Sialic Acid                             |
| 44     | CD4 DR+                                               |
| 45     | CD4 Total (IforLorT) Gag                              |
| 46     | CD4 Total (IforLorT) Env                              |
| 47     | Nab Breadth                                           |
| 48     | Nab Titer (geo. Mean)                                 |
| 49     | Nab Titer (normal average)                            |
