# Supplementary material for: Distinct Immunoglobulin Fc Glycosylation Patterns Are Associated with Disease Nonprogression and Broadly Neutralizing Antibody Responses in Children with HIV Infection
Source: PubMed Central journal article supplement (PMC7763548; doi:10.1128/msphere.00880-20), 2020-12-23
Supplement: mSphere.00880-20-st004.pdf [file mSphere.00880-20-st004.pdf]

Panel intracellular cytokine staining

| Antibody  | Fluorochrome  | clone    | supplier   |
|-----------|---------------|----------|------------|
| CD3       | BV605         | OKT3     | BioLegend  |
| CD4       | BV510         | L200     | BD         |
| CD8       | BV421         | RPA-T8   | BD         |
| TNF-alpha | PE-Cy7        | MAb11    | BD         |
| IL-2      | FITC          | 5344.111 | BD         |
| IFN-gamma | AlexaFluor700 | B27      | BD         |
| Live/dead | Near-IR       | N/A      | Invitrogen |

Panel memory differentiation/activation

| Antibody  | Fluorochrome  | clone   | supplier    |
|-----------|---------------|---------|-------------|
| CD3       | BV605         | OKT3    | BioLegend   |
| CD4       | BV510         | L200    | BD          |
| CD8       | BV421         | RPA-T8  | BD          |
| CD38      | PE-Cy7        | HIT2    | BD          |
| CCR7      | PE            | #150503 | R&D systems |
| HLA-DR    | FITC          | L243    | BD          |
| CD45RA    | AlexaFluor700 | HI100   | BioLegend   |
| Live/dead | Near-IR       | N/A     | Invitrogen  |

Panel T-follicular helper cells

| Antibody | Fluorochrome    | clone     | supplier            |
|----------|-----------------|-----------|---------------------|
| CD69     | BUV 395         | FN50      | BD                  |
| CCR6     | BUV 496         | 11A9      | BD                  |
| PD1      | BV 421          | EH12.1    | BD                  |
| CD8      | V500            | RPA-T8    | BD                  |
| CCR4     | BV 605          | L291H4    | biolegend           |
| CD45RA   | BV 650          | HI100     | BD                  |
| CD25     | BV 711          | BC96      | biolegend           |
| CD3      | BV 785          | OKT3      | biolegend           |
| CXCR5    | AlexaFluor 488  | RF8B2     | BD                  |
| CCR7     | PerCp-Cy5-5     | G043H7    | biolegend           |
| CD127    | PE-Cy5          | R34.34    | Beckmann<br>Coulter |
| CD27     | PE-Cy7          | M-T271    | biolegend           |
| CXCR3    | PE-CF594        | 1C6/CXCR3 | BD                  |
| CD40L    | PE              | 24-31     | biolegend           |
| ICOS     | Alexa Fluor 647 | C398.4A   | biolegend           |
| CD4      | AlexaFluor 700  | RPA-T4    | BD                  |

Panel ADCC

| Antibody  | Fluorochrome   | clone    | supplier |
|-----------|----------------|----------|----------|
| CD3       | AlexaFluor 700 | UCHT1    | BD       |
| CD16      | APC-Cy7        | 3G8      | BD       |
| CD56      | PE-Cy7         | B159     | BD       |
| IFN-gamma | APC            | B27      | BD       |
| MIP1-beta | PE             | D21-1351 | BD       |
| CD107a    | PE-Cy5         | H4A3     | BD       |
